# Supplementary material
Source: PubMed Central journal article supplement (PMC5642284)
Supplement: NIHMS911116-supplement-supplemental.pdf [file NIHMS911116-supplement-supplemental.pdf]

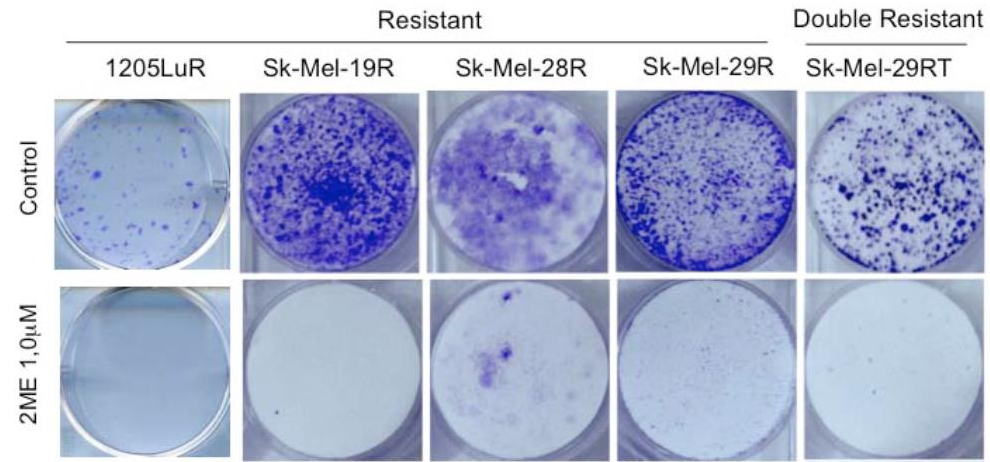

Supplementary figure 1

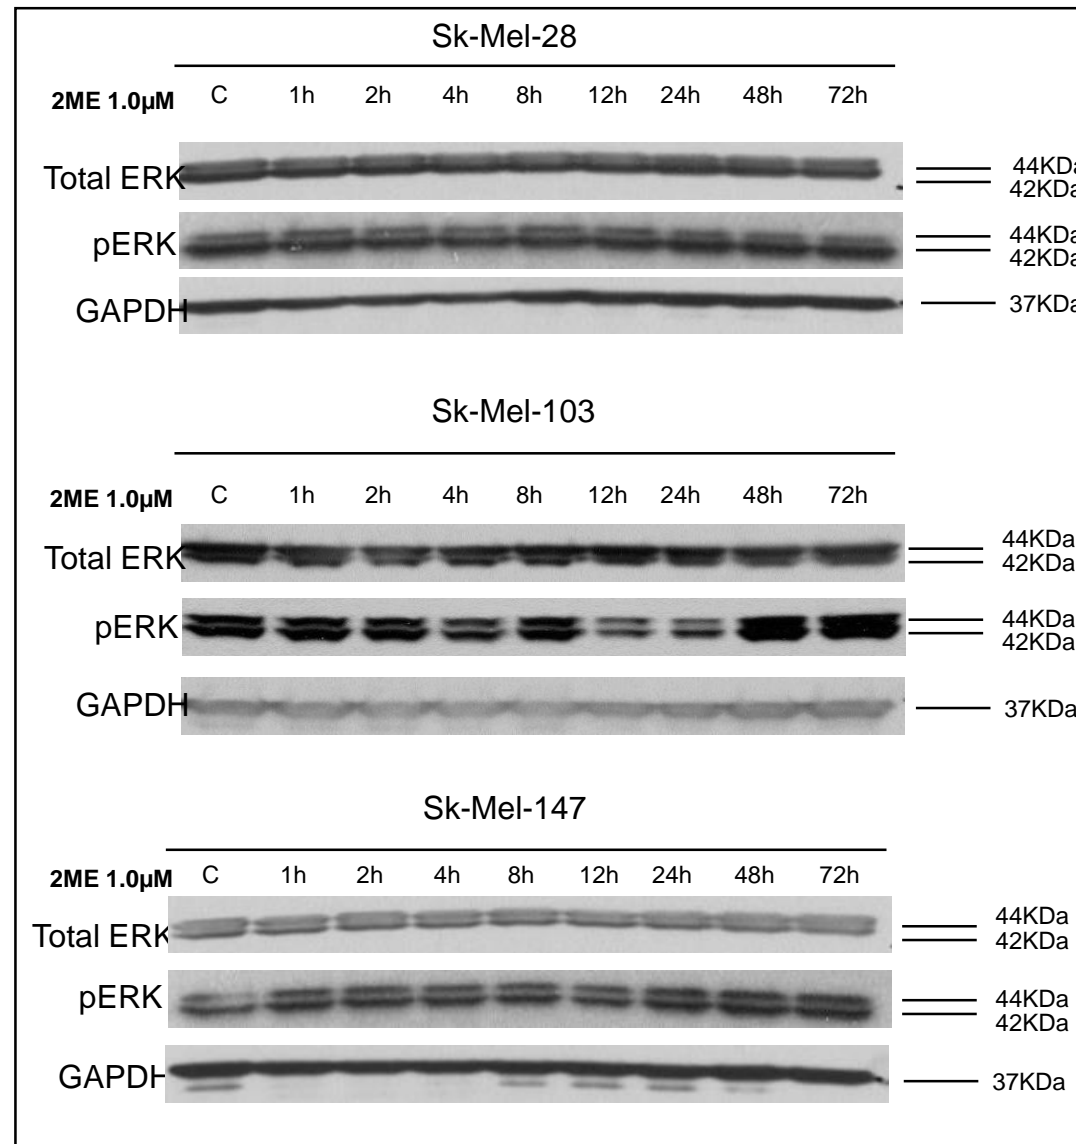

Supplementary figure 2

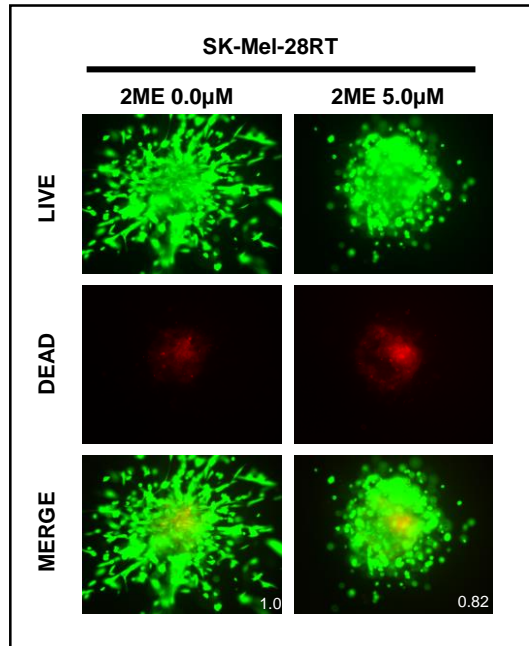

Supplementary figure 3

**Supplementary Table 1 – Senescent cells (%)**

| Cell lines | Treatment            | % of senescent cells |
|------------|----------------------|----------------------|
| SK-MEL-28  | 2ME 0.0 $\mu$ M      | 2.4 $\pm$ 0.17       |
|            | 2ME IC <sub>50</sub> | 23.0 $\pm$ 0.42      |
| SK-MEL-103 | 2ME 0.0 $\mu$ M      | 3.9 $\pm$ 0.15       |
|            | 2ME IC <sub>50</sub> | 19.0 $\pm$ 0.47      |
| SK-MEL-147 | 2ME 0.0 $\mu$ M      | 2.1 $\pm$ 0.05       |
|            | 2ME IC <sub>50</sub> | 18.7 $\pm$ 0.66      |
